# Supplementary material for: Trafficking of Annexins during Membrane Repair in Human Skeletal Muscle Cells
Source: MDPI journal article supplement (doi:10.3390/membranes12020153), 2022-01-26
Supplement: s1 [file s1]

Article

# Trafficking of annexins during membrane repair in human skeletal muscle cells

Coralie Croissant, Céline Gounou, Flora Bouvet, Sisareuth Tan and Anthony Bouter \*

Institute of Chemistry and Biology of Membranes and Nano-objects, UMR 5248, CNRS, University of Bordeaux, IPB, F-33600 Pessac, France.

\* Correspondence: anthony.bouter@u-bordeaux.fr; Tel.: +33 540006860

## SUPPLEMENTARY MATERIALS

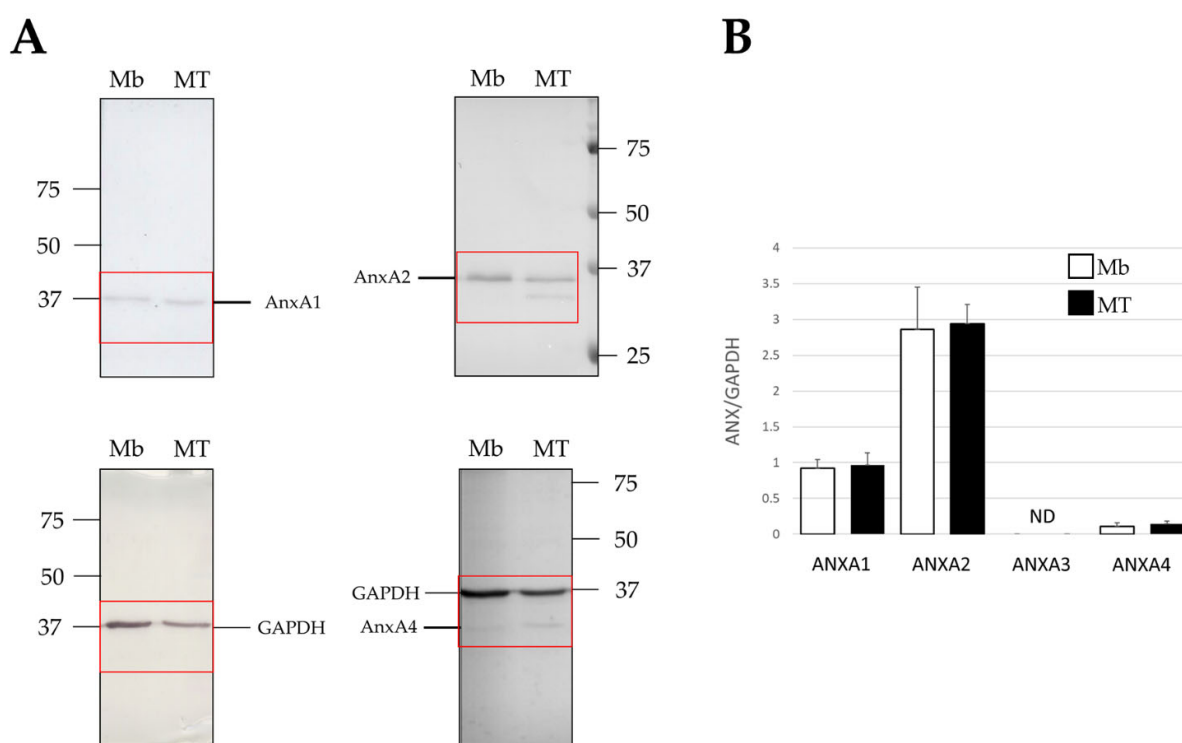

**Figure S1.** Expression of ANX in human myoblasts and myotubes. **(A)** Western blot experiments were performed as described in Figure 1A. GAPDH was used as loading control except for the detection of ANXA1 and A2, which present a similar molecular weight. In this case, a second membrane, loaded with strictly identical samples, was analyzed to verify that similar amount (10 µg) of protein extracts was used. Immunodetection of each ANX gave a unique band (two for ANXA2 in myotubes) at the expected apparent molecular weight. These results indicated the absence of cross-reactivity between the different antibodies used. Red boxes denote the regions of the original blots that are presented in the Figure 1A of the manuscript. **(B)** ImageJ software (Gels plugging) was used to measure the relative intensity of protein bands. Histograms represent mean (± S.D.) of ANX/GAPDH ratio calculated from at least three independent experiments. A Wilcoxon test was performed to identify putative statistical difference ( $p < 0.05$ ) between values obtained for myoblasts (Mb) and myotubes (MT). ND: Not detected.

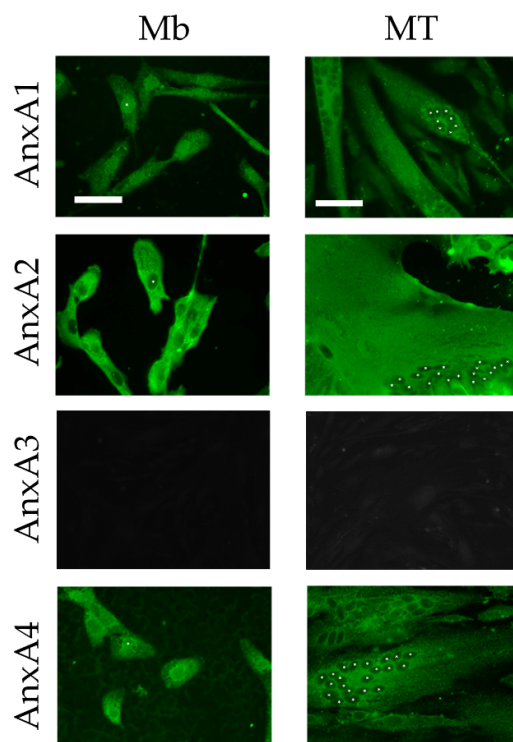

**Figure S2.** Subcellular distribution of ANX in human myoblasts and myotubes. Subcellular localization of endogenous ANXA1 to A4 (green) in LHCN myoblasts and myotubes by immunocyto-fluorescence. White asterisks indicate nuclei in one myoblast and one myotube per image. Scale bars: 50  $\mu$ m.

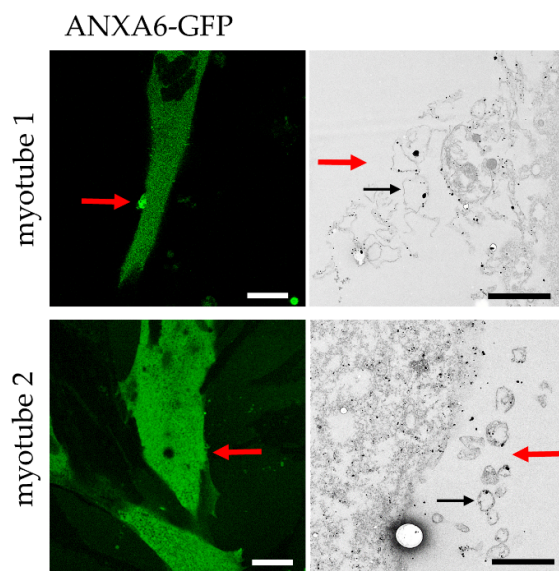

**Figure S3.** Correlative imaging of ANXA6 in damaged LHCN myotubes. Two different ANXA6-GFP expressing LHCN myotubes were damaged by laser ablation (red arrow) and immunostained for ANXA6 using a secondary antibody coupled to gold nanoparticles. Fluorescence image obtained about 90 s after laser ablation is presented (left-hand image) together with TEM images (right-hand images). The right-hand images show ANXA6 (black particles) inside circular structures (black arrow). Scale bar for fluorescence images: 10  $\mu$ m; for TEM: 1  $\mu$ m.
